# Supplementary material for: Local Knowledge of Utilisation and Threats Patterns of Termites around Pendjari Biosphere Reserve, West – Africa
Source: Research Square preprint supplement (doi:10.21203/rs.3.rs-996890/v1), 2021-10-21
Supplement: Supplementary file 1 [file 5681a779a5917601939f3d9b.docx]

**Additional file 1:** Questionnaire for assessing Local Knowledge of Utilization and Threats Patterns of Termites

**Section 1. Data on the village and Socio-demographic data of the informant**

| - 1. Name of the village: | Location of the village |
| --- | --- |
| 1.2. Identification number: | 1.3. Ethnic group: |
| 1.4. Name of the informant: | |
| 1.5. Informant language: | 1.6- Gender: Men ⃝ Women ⃝ |
| 1.7. Age : | 1.8. Length of residence: |
| 1.9. Education level: | 1.10. Profession: |

**Section 2. Free-listing of the known uses of termites and termite mound**

2.1. Do you know termite species and their mounds? Yes ⃝ No ⃝

2.2. How do you call it in your language and what is the meaning of this designation?

| Local designation: |  |
| --- | --- |
| Meaning of the designation: |  |

2.4. Please list the uses of termite species that you know

| Use-categories | N⁰ | Termite or Mounds | Give the specific use and describe how you use it |
| --- | --- | --- | --- |
| Food uses | 1 |  |  |
| 2 |  |  |
| 3 |  |  |
| 4 |  |  |
| Medicinal  uses | 1 |  |  |
| 2 |  |  |
| 3 |  |  |
| 4 |  |  |
| 5 |  |  |
| Feed uses | 1 |  |  |
| 2 |  |  |
| 3 |  |  |
| Construction uses | 1 |  |  |
| 2 |  |  |
| 3 |  |  |
| 4 |  |  |
| Cultural and ritual uses | 1 |  |  |
| 2 |  |  |
| 3 |  |  |
| 4 |  |  |
| Energy | 1 |  |  |
| 2 |  |  |
| 3 |  |  |
| 4 |  |  |

**Section 3. Threat factors of sustainable uses of termites species and termite mounds**

3.1. Could you please score the threat factors of sustainable uses of termite species and their mounds (Agricultural activities, Construction activities, Vegetation fire and Climate Change)? Use the following defined threat scale level: low (1), medium (2), high (3) and very high (4).

| Threat factors | Agricultural activities | Construction activities | Bushfire | Climate change |
| --- | --- | --- | --- | --- |
| Score |  |  |  |  |
